# Supplementary material for: Raman Spectroscopic Tools to Probe the Skin–(Trans)dermal Formulation Interface
Source: PubMed Central journal article supplement (PMC9644382; doi:10.1021/acs.molpharmaceut.2c00480), 2022-09-06
Supplement: mp2c00480_si_001.pdf [file mp2c00480_si_001.pdf]

## SUPPORTING INFORMATION

### **Raman spectroscopic tools to probe the skin-(trans)dermal formulation interface**

Hazel Garvie-Cook, Magdalena Hoppel and Richard H. Guy\*

University of Bath, Department of Pharmacy & Pharmacology, Claverton Down, Bath, BA2 7AY, U.K.

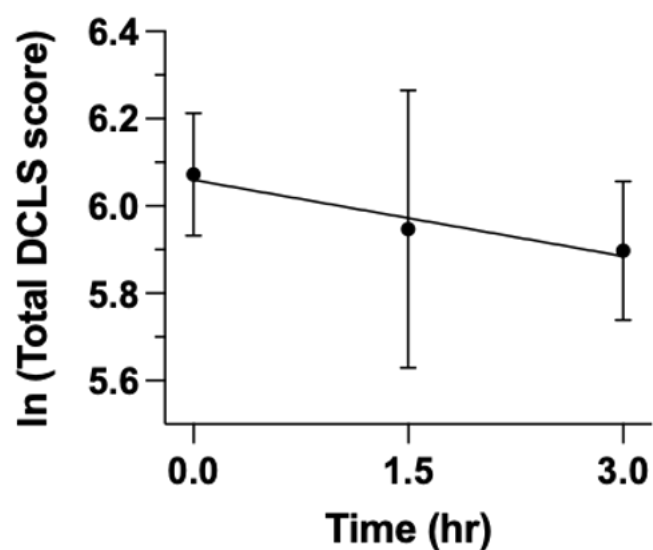

'Clearance' of nicotine from the skin interrogated by confocal Raman spectroscopy is determined from the slope of the natural logarithm of the attenuation of the sum of the measured DCLS analysis scores (over the four positions examined) as a function of time.
